# Supplementary material for: Bovine serum albumin unfolds in Couette flow
Source: Royal Society of Chemistry journal article supplement (doi:10.1039/c1sm06704d), 2011-10-27
Supplement: c1sm06704d.pdf [file c1sm06704d.pdf]

## Supplementary Data

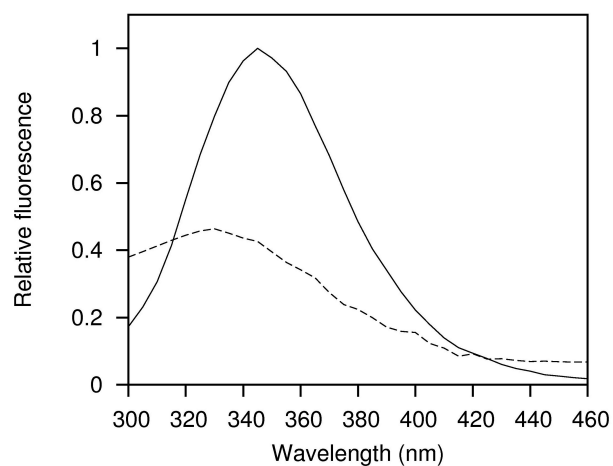

Figure S1. Tryptophan fluorescence emission spectra of BSA (0.1 mg/ml, pH 7.4). The figure shows the spectra of BSA before (solid line) and after (dashed line) 1 h shear treatment at 300 s<sup>-1</sup>.
